# Supplementary material for: A DFT+U study on the contribution of 4f electrons to oxygen vacancy formation and migration in Ln-doped CeO2
Source: Royal Society of Chemistry journal article supplement (doi:10.1039/c6cp00637j), 2016-01-01
Supplement: c6cp00637j1.pdf [file c6cp00637j1.pdf]

## Electronic Supporting Information

### **A DFT+*U* study on the contribution of 4f electrons to oxygen vacancy formation and migration in Ln-doped CeO<sub>2</sub>**

Musa Alaydrus<sup>\*1,2</sup>, Mamoru Sakaue<sup>\*1,3</sup>, and Hideaki Kasai<sup>1,4,5</sup>

<sup>1</sup>Department of Applied Physics, Graduate School of Engineering, Osaka University,  
2-1 Yamadaoka Suita, Osaka, 565-0871, Japan

<sup>2</sup>Department of Engineering Physics, Faculty of Industrial Technology, Bandung Institute of  
Technology, Ganesha 10, Bandung, 40132, Indonesia.

<sup>3</sup>Center for International Affairs, Graduate School of Engineering, Osaka University,  
2-1 Yamadaoka, Suita, Osaka 565-0871, Japan.

<sup>4</sup>National Institute of Technology, Akashi College, 679-3 Nishioka,  
Uozumi-cho, Akashi, Hyogo 674-8501, Japan

<sup>5</sup>Institute of Industrial Science, The University of Tokyo, 4-6-1 Komaba, Meguro-ku, Tokyo,  
153-8505, Japan

\*E-mail: [musa@dyn.ap.eng.osaka-u.ac.jp](mailto:musa@dyn.ap.eng.osaka-u.ac.jp)  
[sakaue@dyn.ap.eng.osaka-u.ac.jp](mailto:sakaue@dyn.ap.eng.osaka-u.ac.jp)

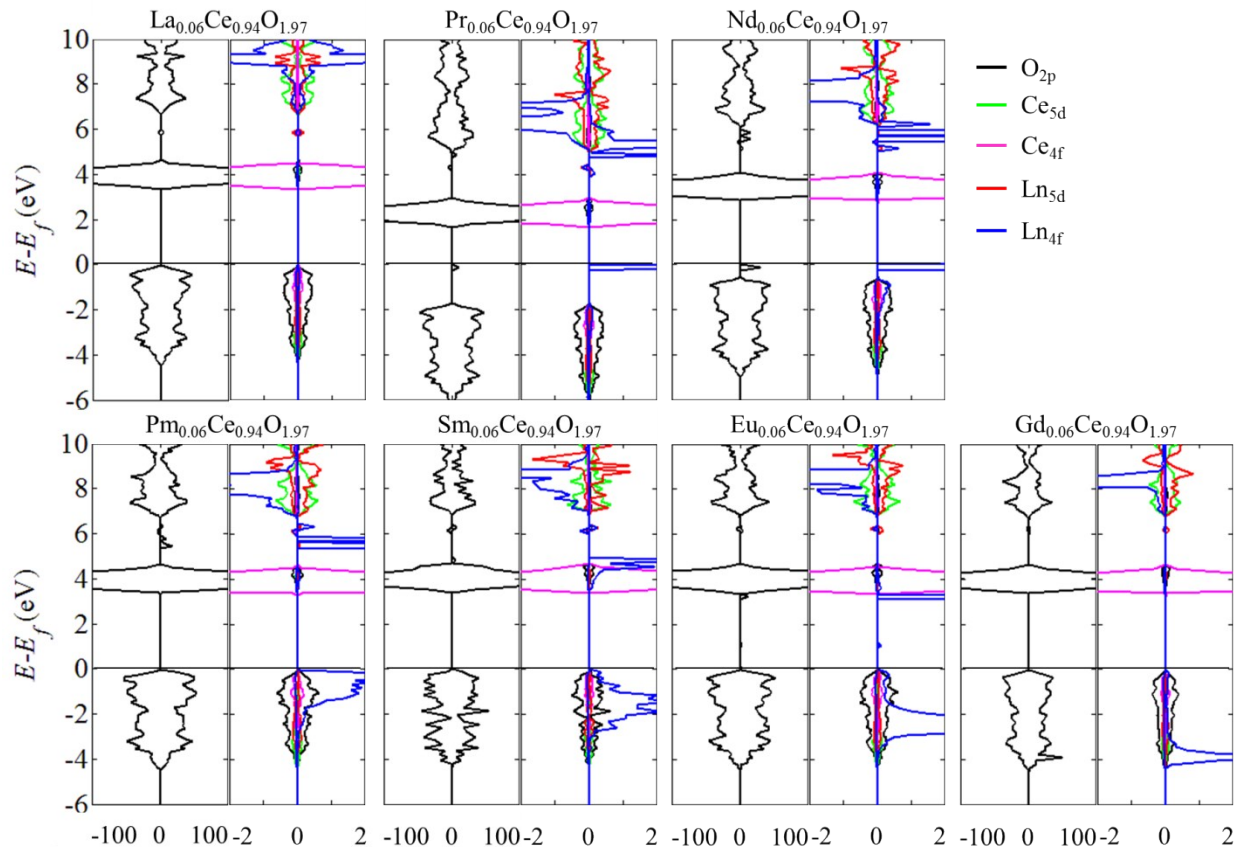

Figure S1. Total DOS and projected DOS obtained from hybrid functional calculations [1].

Table S1. The vacancy formation energies,  $E_f^{vac}$ , and migration energies,  $\Delta E_m$ , for ip1, ip2, and ip3. The calculations were conducted by considering 4f electrons frozen at the core ( $\text{Ln}_{4f@core}$ ) and as valence electrons with  $U_{\text{eff}@Ln} = 0$  eV as well as with the fitted  $U_{\text{eff}@Ln}$  specified in the computational details section in the main manuscript.

| Systems            | $\text{Ln}_{4f}$ Treatment                                                                                                  | $\Delta E_m$ (eV) |              |              | $E_f^{vac}$ (eV) |
|--------------------|-----------------------------------------------------------------------------------------------------------------------------|-------------------|--------------|--------------|------------------|
|                    |                                                                                                                             | ip1(fwd/bwd)      | ip2(fwd/bwd) | ip3(fwd/bwd) |                  |
| LCO                | $U_{\text{eff}@La} = 0$ eV                                                                                                  | 0.338/0.424       | 0.811/0.782  | 1.591/1.591  | -0.614           |
|                    | $U_{\text{eff}@La} = 4.5$ eV                                                                                                | 0.305/0.465       | 0.794/0.811  | 1.695/1.695  | -0.662           |
| $\text{CeO}_{2-x}$ | $U_{\text{eff}@Ce}^* = 5$ eV                                                                                                |                   | 0.442/0.442  |              | 3.693            |
|                    | $\text{Ce}_{4f@core}^{**}$                                                                                                  | 0.370/0.486       | 0.798/0.809  | 1.629/1.629  | 4.546            |
|                    | $U_{\text{eff}@Pr} = 0$ eV                                                                                                  | 0.534/0.333       | 0.395/0.330  | 0.968/0.968  | 3.127            |
| PCO                | $U_{\text{eff}@Pr} = 4$ eV                                                                                                  | 0.466/0.414       | 0.810/0.746  | 1.361/1.361  | 1.640            |
|                    | $\text{Pr}_{4f@core}$                                                                                                       | 0.437/0.464       | 0.801/0.771  | 1.356/1.356  | -0.590           |
|                    | $U_{\text{eff}@Nd} = 0$ eV                                                                                                  | 0.536/0.366       | 0.700/0.662  | 0.898/0.898  | 1.077            |
| NCO                | $U_{\text{eff}@Nd} = 3.5$ eV                                                                                                | 0.497/0.431       | 0.788/0.747  | 1.325/1.325  | -0.100           |
|                    | $\text{Nd}_{4f@core}$                                                                                                       | 0.501/0.447       | 0.799/0.740  | 1.373/1.373  | -0.608           |
|                    | $U_{\text{eff}@Pm} = 0$ eV                                                                                                  | 0.585/0.373       | 0.831/0.697  | 1.171/1.171  | 0.683            |
| PmCO               | $U_{\text{eff}@Pm} = 3.5$ eV                                                                                                | 0.544/0.391       | 0.827/0.718  | 1.293/1.293  | -0.581           |
|                    | $\text{Pm}_{4f@core}$                                                                                                       | 0.574/0.430       | 0.793/0.700  | 1.256/1.256  | -0.656           |
|                    | $U_{\text{eff}@Sm} = 0$ eV                                                                                                  | 0.591/0.392       | 0.776/0.654  | 1.001/1.001  | 0.360            |
| SCO                | $U_{\text{eff}@Sm} = 4$ eV                                                                                                  | 0.578/0.425       | 0.814/0.710  | 1.193/1.193  | -0.622           |
|                    | $\text{Sm}_{4f@core}$                                                                                                       | 0.612/0.404       | 0.788/0.669  | 1.189/1.189  | -0.697           |
| ECO                | $U_{\text{eff}@Eu} = 0$ eV                                                                                                  | 0.571/0.389       | 0.836/0.714  | 1.068/1.068  | -0.293           |
|                    | $U_{\text{eff}@Eu} = 4$ eV                                                                                                  | 0.598/0.435       | 0.839/0.730  | 1.230/1.230  | -0.650           |
|                    | $U_{\text{eff}@Gd} = 0$ eV                                                                                                  | 0.723/0.337       | 0.775/0.575  | 1.015/1.015  | -0.636           |
| GCO                | $U_{\text{eff}@Gd} = 4$ eV                                                                                                  | 0.708/0.355       | 0.774/0.590  | 1.039/1.039  | -0.793           |
|                    | $\text{Gd}_{4f@core}$                                                                                                       | 0.734/0.363       | 0.766/0.576  | 1.018/1.018  | -0.793           |
| YCO                | --                                                                                                                          | 0.818/0.316       | 0.750/0.503  | 0.906/0.906  | -0.891           |
| *                  | $U_{\text{eff}} = 5$ eV for all Ce 4f-electrons.                                                                            |                   |              |              |                  |
| **                 | The 4f-electrons of two reduced Ce ions as virtual dopants in the presence of an oxygen vacancy, are set as core electrons. |                   |              |              |                  |

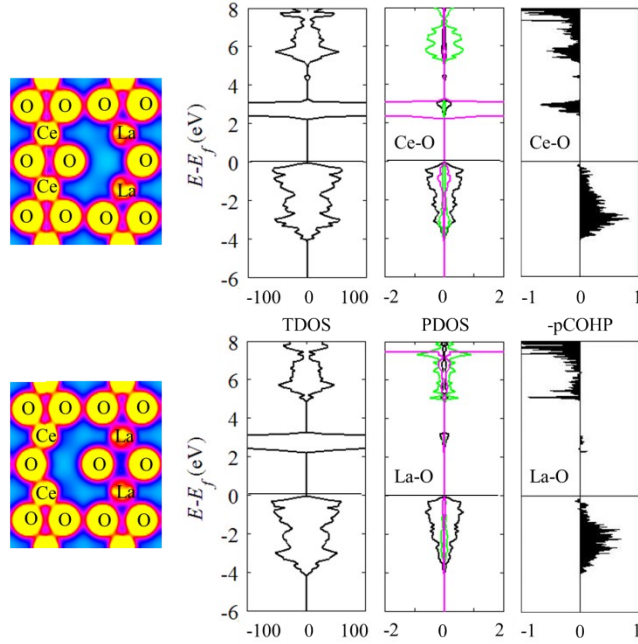

Figure S2. Charge density plots within energy range of  $O_{2p}$ -VB, total and projected DOS and the corresponding COHP curves of La-doped  $CeO_2$  at initial and final states of ip1.

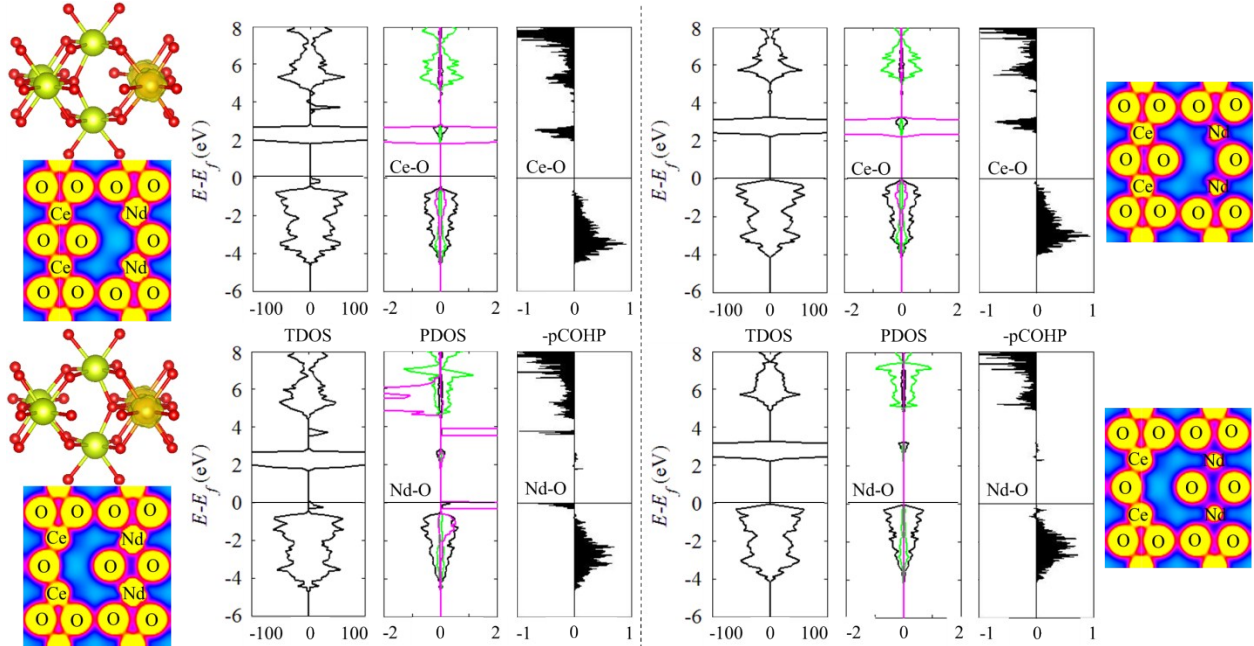

Figure S3. Charge density plots within energy range of  $O_{2p}$ -VB, total and projected DOS and the corresponding COHP curves of Nd-doped  $CeO_2$  at initial and final states of ip1. Left panel shows the 4fval results while right panel shows the 4fcore results.

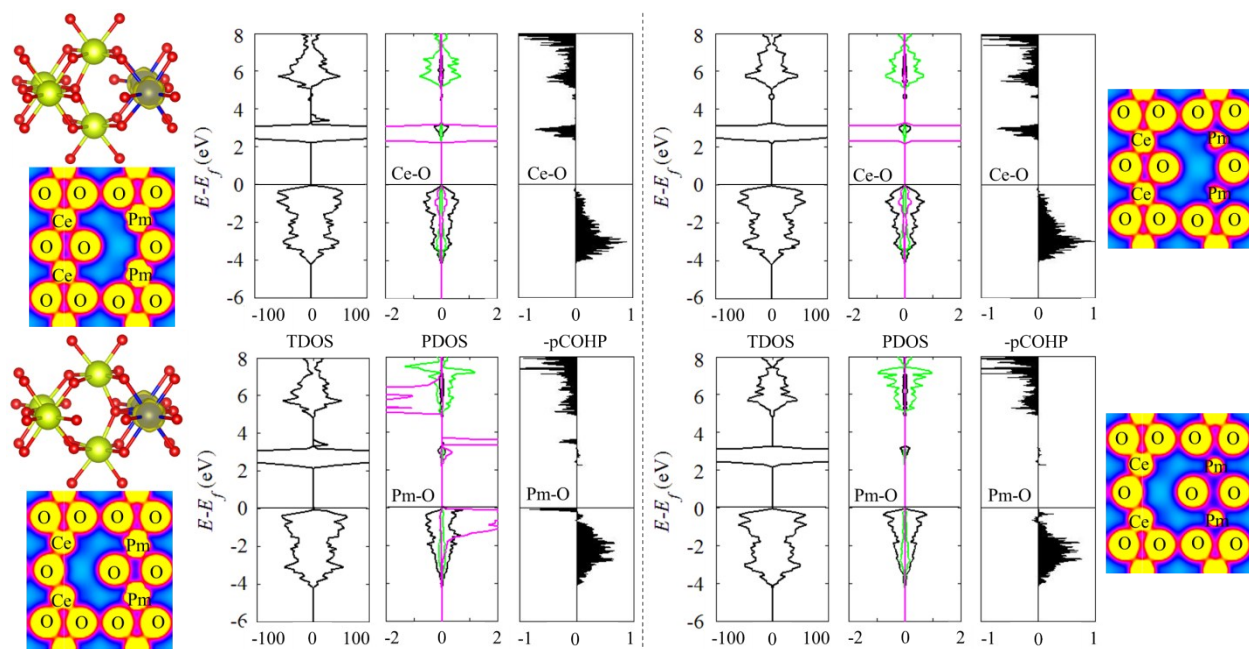

Figure S4. Charge density plots within energy range of  $O_{2p}$ -VB, total and projected DOS and the corresponding COHP curves of Pm-doped  $CeO_2$  at initial and final states of ip1. Left panel shows the 4fval results while right panel shows the 4fcore results.

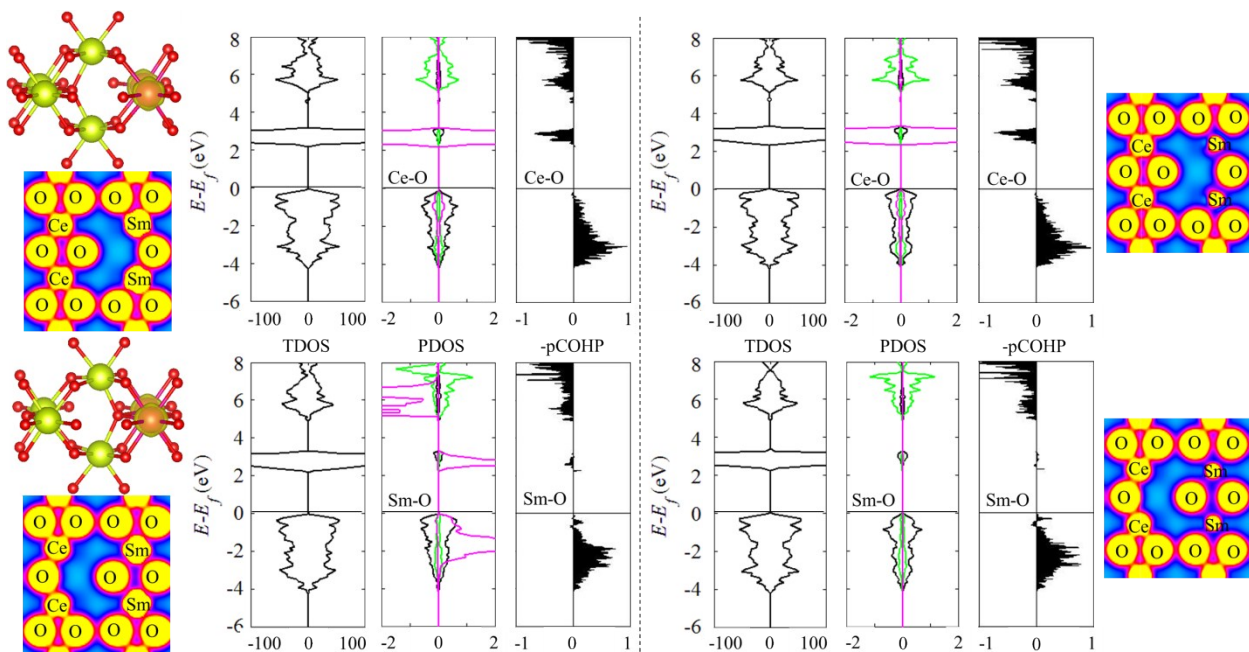

Figure S5. Charge density plots within energy range of  $O_{2p}$ -VB, total and projected DOS and the corresponding COHP curves of Sm-doped  $CeO_2$  at initial and final states of ip1. Left panel shows the 4fval results while right panel shows the 4fcore results.

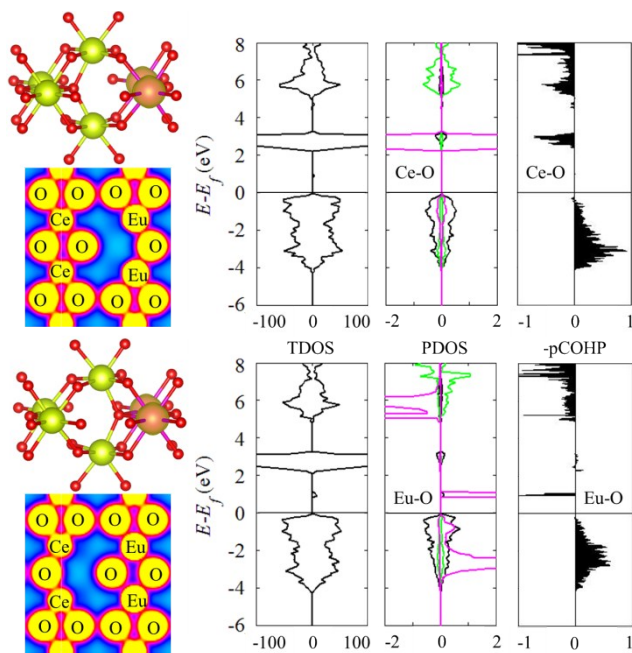

Figure S6. Charge density plots within energy range of  $O_{2p}$ -VB, total and projected DOS and the corresponding COHP curves of Eu-doped  $CeO_2$  at initial and final states of ip1.

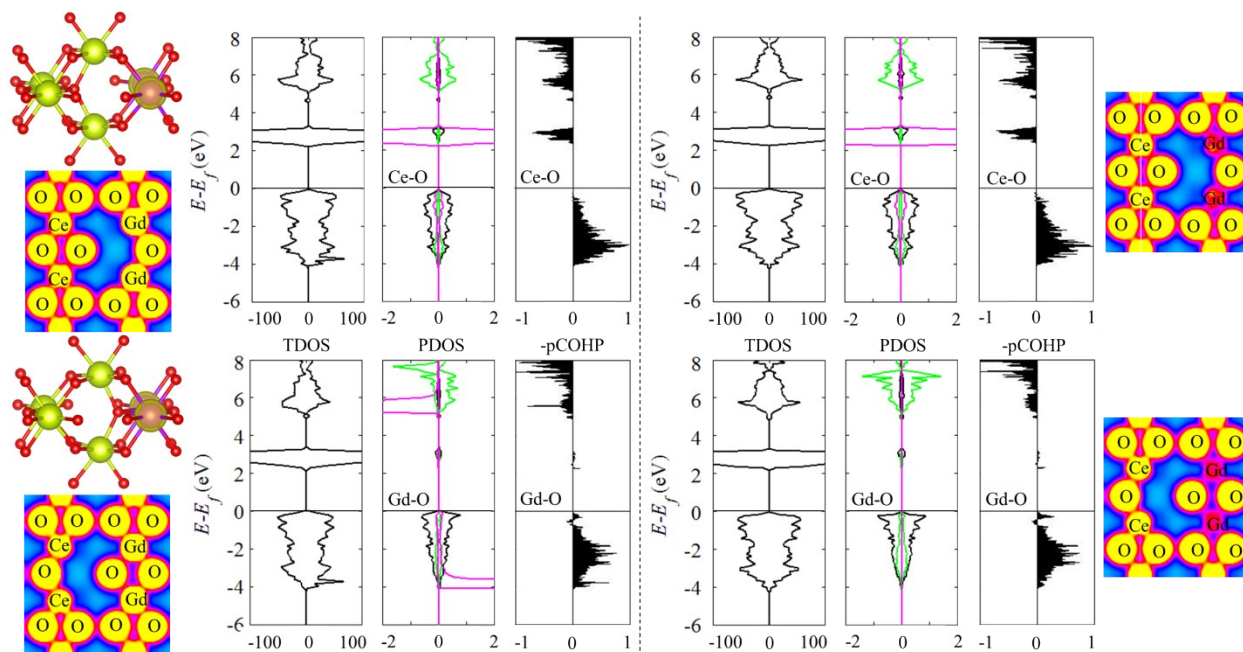

Figure S7. Charge density plots within energy range of  $O_{2p}$ -VB, total and projected DOS and the corresponding COHP curves of Gd-doped  $CeO_2$  at initial and final states of ip1. Left panel shows the 4fval results while right panel shows the 4fcore results.



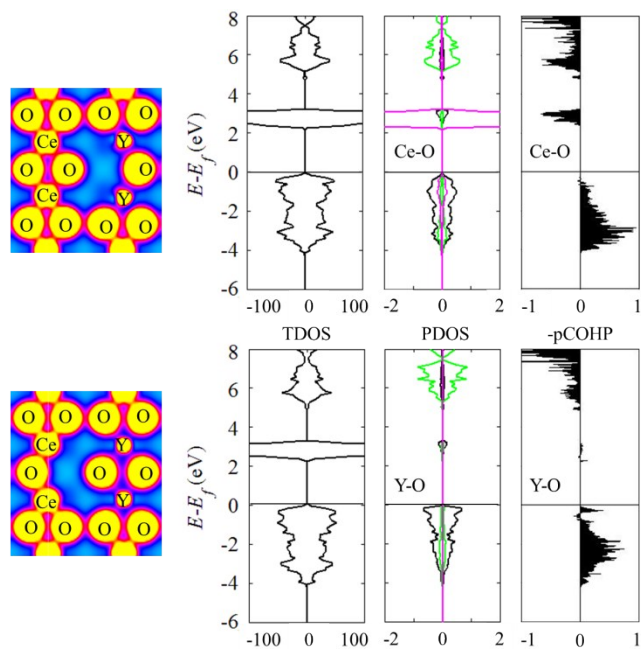

Figure S8. Charge density plots within energy range of  $O_{2p}$ -VB, total and projected DOS and the corresponding COHP curves of Y-doped  $CeO_2$  at initial and final states of ip1.

- [1] A. D. Becke, *The Journal of Chemical Physics*, 1993, 98, 1372-1377.
